# Supplementary material for: Development of polypeptide-based zwitterionic amphiphilic micelles for nanodrug delivery
Source: Royal Society of Chemistry journal article supplement (doi:10.1039/c6tb01144f), 2016-01-01
Supplement: c6tb01144f1.pdf [file c6tb01144f1.pdf]

**Supporting information**

**Development of polypeptide-based zwitterionic amphiphilic  
micelles for nano drug delivery**

Guanglong Ma<sup>a</sup>, Weifeng Lin<sup>a</sup>, Zhen Wang<sup>a</sup>, Juan Zhang<sup>a</sup>, Haofeng Qian<sup>a</sup>, Liangbo Xu<sup>a</sup>, Zhefan Yuan<sup>\*,a</sup>, Shengfu Chen<sup>\*,a,b</sup>

<sup>a</sup> Key Laboratory of Biomass Chemical Engineering of Ministry of Education, Department of Chemical and Biological Engineering, Zhejiang University, Hangzhou, Zhejiang 310027, China.

<sup>b</sup> Jiangsu Collaborative Innovation Center of Biomedical Functional Materials, Jiangsu Key Laboratory of Biomedical Materials, College of Chemistry and Materials Science, Nanjing Normal University, Nanjing 210046, China.

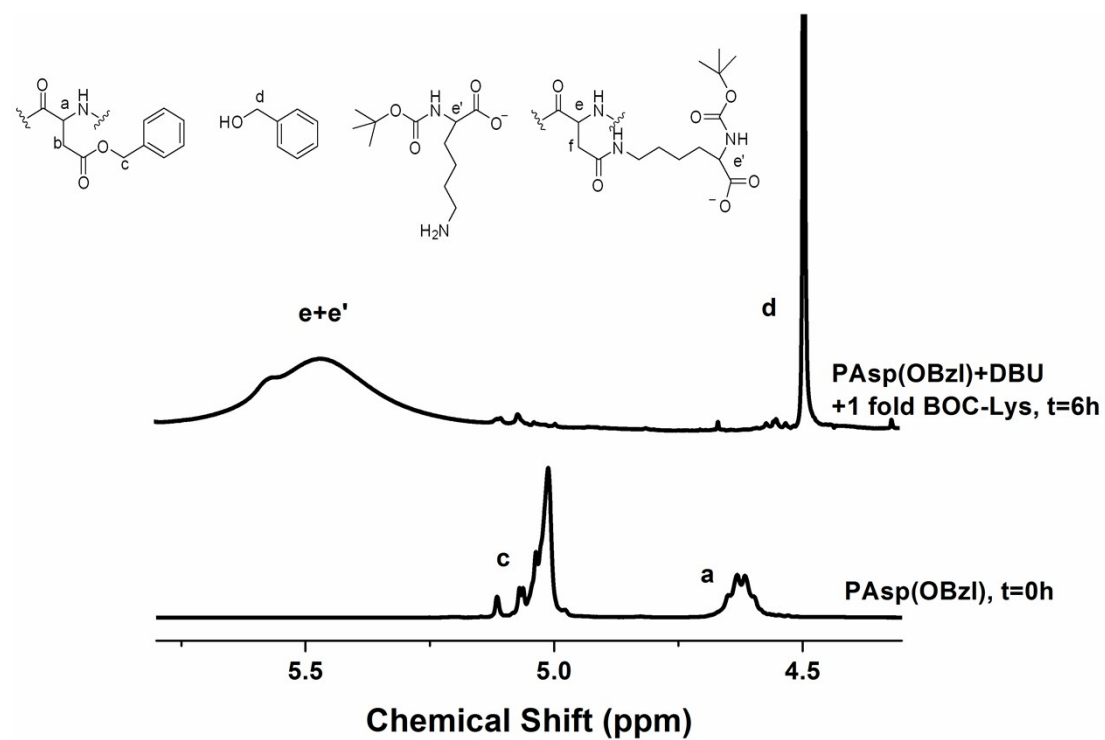

Figure S1. Time-trace of  $^1\text{H}$  NMR spectra of PAsp(OBzl) reacting with 1 fold BOC-Lys in  $\text{DMSO-}d_6$  at  $25^\circ\text{C}$

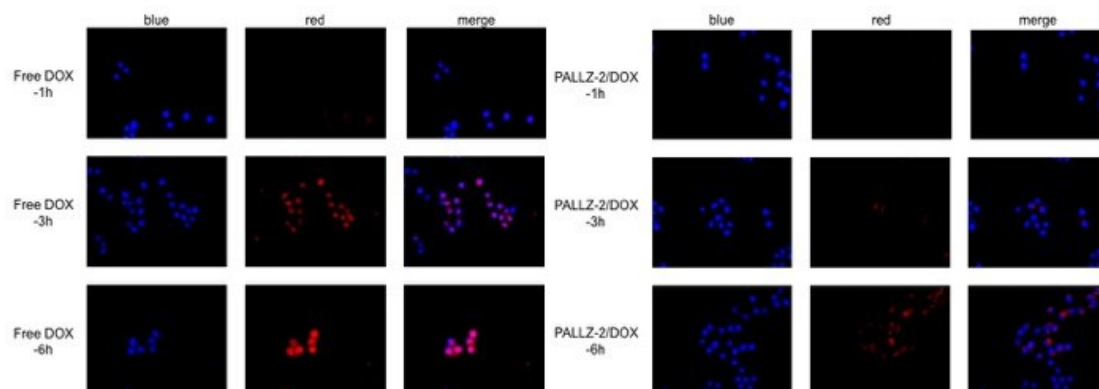

Figure S2. Inverted fluorescence microscope images of RAW264.7 cells after incubation with free DOX and PALLZ-2/DOX for 1, 3 and 6 h.
